# Supplementary material
Source: PubMed Central journal article supplement (PMC2912596)
Supplement: supp_83_1_174__1.pdf [file supp_83_1_174__1.pdf]

TABLE 1: Rocky Mountain spotted fever case reports and incidence (per million persons) by state and geographic region, 2000-2007, United States (National Electronic Telecommunications System for Surveillance).

| Region             | n    | 2000-2007<br>Incidence | 2000-2003<br>Incidence | 2004-2007<br>Incidence | Percent change<br>2000-2003 vs. 2004-2007 |
|--------------------|------|------------------------|------------------------|------------------------|-------------------------------------------|
| New England        | 95   | 0.84                   | 0.46                   | 1.21                   | +163%                                     |
| Connecticut        | 6    | 0.22                   | 0.22                   | 0.22                   |                                           |
| Maine*             | 1    | 0.10                   | 0.00                   | 0.19                   |                                           |
| Massachusetts      | 58   | 1.13                   | 0.62                   | 1.63                   |                                           |
| New Hampshire      | 4    | 0.39                   | 0.20                   | 0.58                   |                                           |
| Rhode Island       | 25   | 2.94                   | 1.41                   | 4.47                   |                                           |
| Vermont            | 1    | 0.20                   | 0.00                   | 0.40                   |                                           |
| Middle Atlantic    | 489  | 1.52                   | 1.11                   | 1.93                   | +74%                                      |
| New Jersey         | 170  | 2.48                   | 1.56                   | 3.39                   |                                           |
| New York           | 127  | 0.83                   | 0.48                   | 1.16                   |                                           |
| Pennsylvania       | 192  | 1.95                   | 1.77                   | 2.12                   |                                           |
| East North Central | 298  | 0.81                   | 0.53                   | 1.10                   | +108%                                     |
| Illinois           | 124  | 1.23                   | 0.68                   | 1.77                   |                                           |
| Indiana            | 30   | 0.60                   | 0.45                   | 0.76                   |                                           |
| Michigan           | 30   | 0.37                   | 0.30                   | 0.45                   |                                           |
| Ohio               | 107  | 1.17                   | 0.86                   | 1.48                   |                                           |
| Wisconsin          | 7    | 0.16                   | 0.00                   | 0.32                   |                                           |
| West North Central | 1146 | 7.30                   | 3.79                   | 10.74                  | +184%                                     |
| Iowa               | 40   | 1.70                   | 0.77                   | 2.62                   |                                           |
| Kansas             | 22   | 1.01                   | 0.37                   | 1.64                   |                                           |
| Minnesota          | 21   | 0.52                   | 0.20                   | 0.83                   |                                           |
| Missouri           | 963  | 21.00                  | 11.09                  | 30.64                  |                                           |
| Nebraska           | 74   | 5.32                   | 2.18                   | 8.40                   |                                           |

## MCQUISTON AND OTHERS

## RMSF IN THE UNITED STATES, 2000-2007

|                    |      |       |       |       |       |
|--------------------|------|-------|-------|-------|-------|
| North Dakota       | 2    | 0.39  | 0.39  | 0.39  |       |
| South Dakota       | 24   | 3.88  | 3.29  | 4.46  |       |
| South Atlantic     | 5704 | 13.01 | 8.05  | 17.67 | +120% |
| Delaware           | 67   | 10.19 | 4.69  | 15.40 |       |
| Dist. Columbia     | 10   | 2.15  | 1.73  | 2.57  |       |
| Florida            | 130  | 0.95  | 0.80  | 1.08  |       |
| Georgia            | 389  | 5.49  | 3.30  | 7.52  |       |
| Maryland           | 514  | 11.69 | 9.57  | 13.74 |       |
| North Carolina     | 3581 | 52.61 | 29.70 | 74.16 |       |
| South Carolina     | 445  | 13.28 | 12.49 | 14.03 |       |
| Virginia           | 529  | 8.93  | 4.29  | 13.35 |       |
| West Virginia      | 39   | 2.70  | 1.67  | 3.74  |       |
| East South Central | 1525 | 10.94 | 6.81  | 14.95 | +120% |
| Alabama            | 381  | 10.55 | 3.92  | 17.03 |       |
| Kentucky           | 28   | 0.85  | 0.86  | 0.84  |       |
| Mississippi        | 156  | 6.77  | 7.18  | 6.38  |       |
| Tennessee          | 960  | 20.33 | 13.07 | 27.29 |       |
| West South Central | 2063 | 7.81  | 4.92  | 10.56 | +115% |
| Arkansas           | 802  | 36.57 | 23.27 | 49.44 |       |
| Louisiana          | 25   | 0.70  | 0.28  | 1.14  |       |
| Oklahoma           | 1064 | 37.85 | 24.68 | 50.71 |       |
| Texas              | 172  | 0.96  | 0.40  | 1.49  |       |
| Mountain           | 190  | 1.20  | 0.62  | 1.74  | +179% |
| Arizona            | 51   | 1.11  | 0.09  | 2.02  |       |
| Colorado           | 22   | 0.60  | 0.34  | 0.85  |       |
| Idaho              | 29   | 2.61  | 0.75  | 4.33  |       |
| Montana            | 14   | 1.89  | 1.93  | 1.86  |       |
| Nevada             | 7    | 0.38  | 0.82  | 0.00  |       |
| New Mexico         | 24   | 1.59  | 0.54  | 2.60  |       |
| Utah               | 6    | 0.31  | 0.54  | 0.10  |       |
| Wyoming            | 37   | 9.19  | 6.05  | 12.23 |       |

## MCQUISTON AND OTHERS

## RMSF IN THE UNITED STATES, 2000-2007

|             |        |      |      |      |      |
|-------------|--------|------|------|------|------|
| Pacific     | 21     | 0.06 | 0.06 | 0.05 | --   |
| Alaska*     | 0      | --   | --   | --   |      |
| California  | 7      | 0.02 | 0.04 | 0.01 |      |
| Hawaii*     | 0      | --   | --   | --   |      |
| Oregon      | 14     | 0.49 | 0.43 | 0.55 |      |
| Washington* | 0      | --   | --   | --   |      |
| Total       | 11,531 | 4.94 | 3.02 | 6.79 | 125% |

\* RMSF not considered a notifiable disease for all study years

Correction: Results, "Overall Incidence", 3<sup>rd</sup> paragraph, last sentence: "With the exception of the Pacific and Middle Atlantic regions, incidence in all regions increased more than 200% from the first half (2000-2003) to the second half (2004-2007) of the reporting period (Table 1)."
